# Supplementary material
Source: MDPI journal article supplement (https://www.mdpi.com/2227-9709/10/4/90)
Supplement: s1 [file s1]

Archive with 1 entries (1 files):
- informatics-2614573-supplementary.pdf
